# Supplementary material for: Depletion of dietary aryl hydrocarbon receptor ligands alters microbiota composition and function
Source: PubMed Central journal article supplement (PMC6789125; doi:10.1038/s41598-019-51194-w), 2019-10-11
Supplement: 41598_2019_51194_MOESM1_ESM.pdf [file 41598_2019_51194_MOESM1_ESM.pdf]

## *Supplementary Material*

### **Depletion of dietary aryl hydrocarbon receptor ligands alters microbiota composition and function**

Kyle M. Brawner\*<sup>1</sup>, Venkata A. Yeramilli<sup>1</sup>, Lennard W. Duck<sup>2</sup>, William Van Der Pol<sup>3</sup>, Lesley E. Smythies<sup>2</sup>, Casey D. Morrow<sup>4</sup>, Charles O. Elson<sup>2</sup>, & Colin A. Martin<sup>1</sup>

<sup>1</sup>Department of Surgery, <sup>2</sup>Department of Medicine, <sup>3</sup>Center for Clinical and Translational Science, and <sup>4</sup>Department of Cell, Developmental, and Integrative Biology, University of Alabama at Birmingham, Birmingham, Alabama, United States.

\*Corresponding Author:  
Kyle M. Brawner, Ph.D.  
Postdoctoral Fellow  
Department of Surgery  
University of Alabama at Birmingham  
1600 7th Ave. S., Lowder Building Suite 300  
Birmingham, AL 35233  
Tel: 205-934-3152  
kbrawner@uab.edu

## Supplementary Figure 1

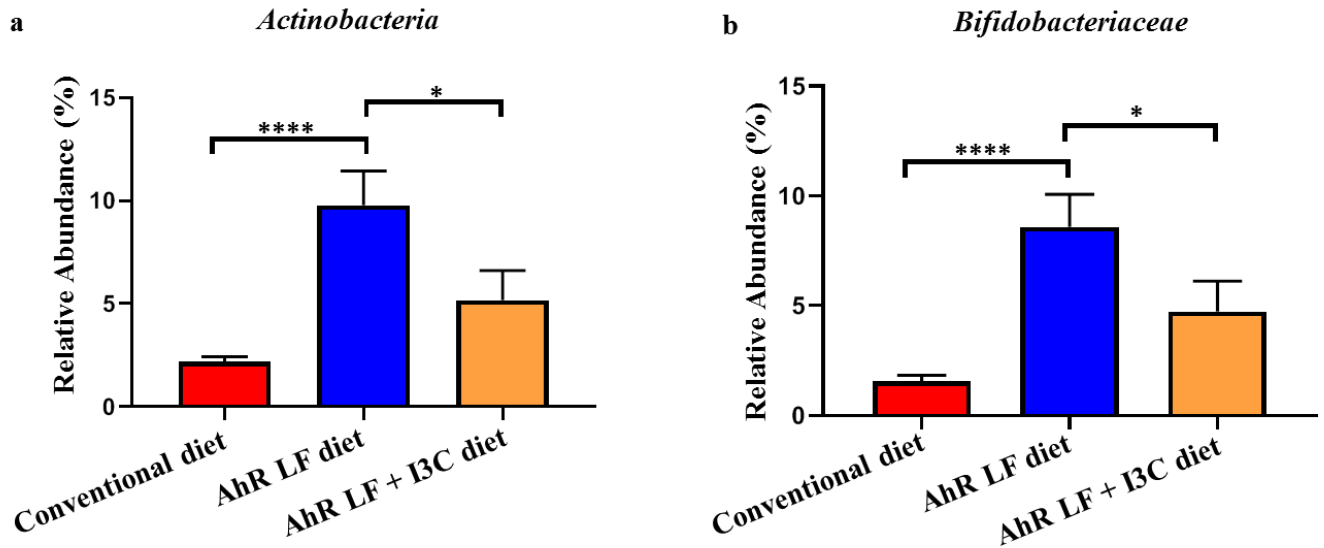

Relative abundance of (a) *Actinobacteria* and (b) *Bifidobacteriaceae* from mice on the conventional diet (n=12), mice on the AhR ligand-free (LF) diet (n=7), and mice on the AhR LF diet supplemented with I3C (AhR LF + I3C diet) (n=6). Error bars show mean  $\pm$  SEM. \*p < 0.05 \*\*\*\*p < 0.0001, one-way ANOVA with Tukey's multiple comparisons test.

## Supplementary Figure 2

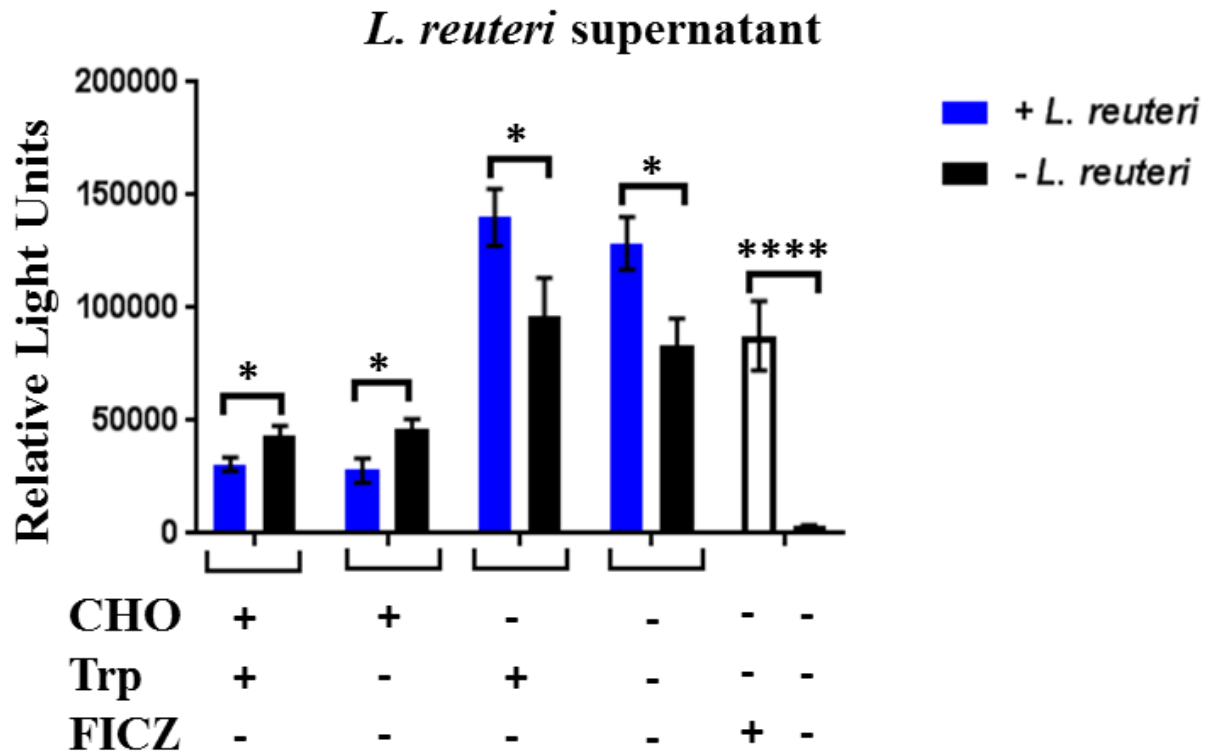

HCT116 cells engineered to express luciferase upon AhR ligation were treated with bacterial conditioned supernatants from *Lactobacillus reuteri* cultured under the indicated conditions. Cells were also treated with non-conditioned broth to establish baseline levels of any AhR ligands present. As a positive control, some cells were treated with 100nM of 6-formylindolo[3,2-b]carbazole (FICZ), a known AhR ligand. Dimethyl sulfoxide (DMSO), the FICZ vehicle, was used as a negative control. n=9 per group. Error bars show mean  $\pm$  SEM. \*p < 0.05 \*\*\*\*p < 0.0001, Student's t test.

### Supplementary Figure 3

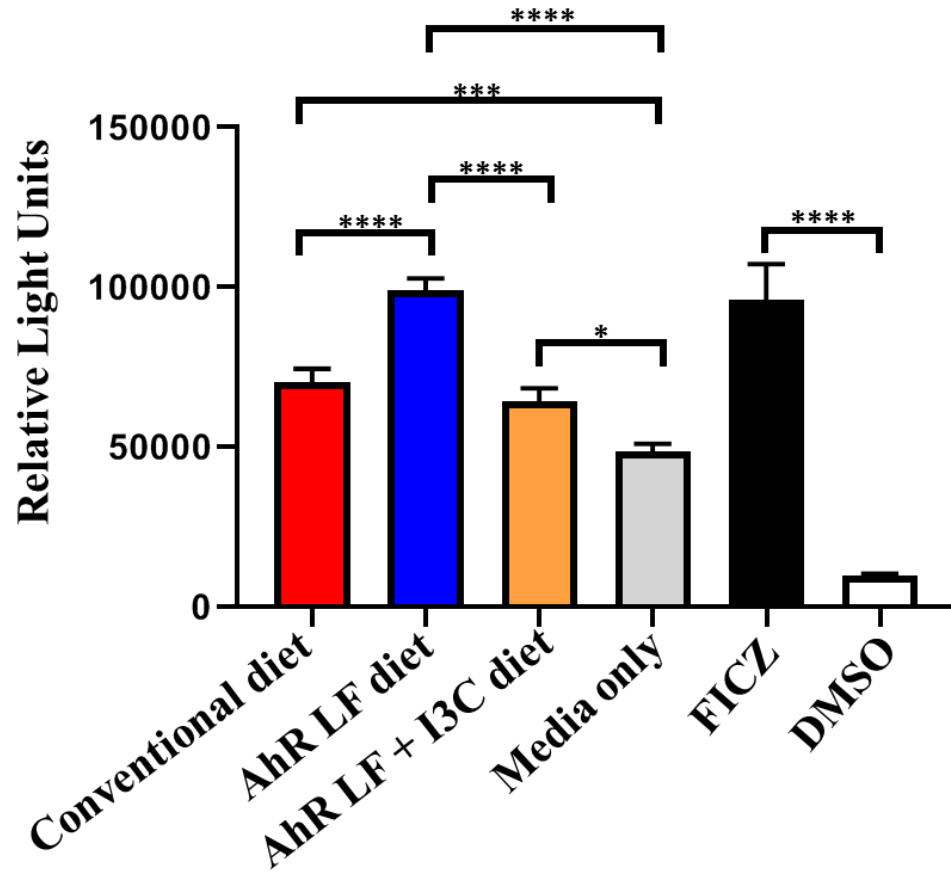

Culture supernatants of fecal samples obtained from mice on the indicated diet were cultured with HCT116 cells that express luciferase when AhR is activated. HCT116 cells were also treated with sterile chopped meat broth (media only) to evaluate how initial levels of AhR ligands in the broth are altered following fecal culture. As a positive control, some cells were treated with 100nM of 6-formylindolo[3,2-b]carbazole (FICZ), a known AhR ligand. Dimethyl sulfoxide (DMSO), the FICZ vehicle, was used as a negative control. n=7 or 8 per group. Error bars show mean  $\pm$  SEM. \*p<0.05 \*\*\*p<0.001 \*\*\*\*p<0.0001, one-way ANOVA with Tukey's multiple comparisons test.

## Supplementary Figure 4

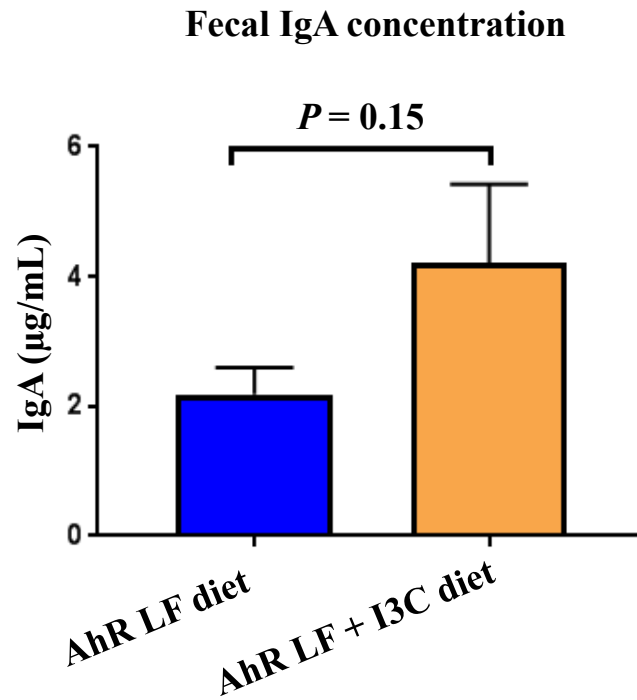

Fecal samples from mice on the AhR ligand-free (LF) diet and AhR LF diet supplemented with I3C (AhR LF + I3C diet) were collected and IgA levels were determined by ELISA.  $n=5$  for each group. Error bars show mean  $\pm$  SEM.  $P$  value was obtained from a two-tailed, unpaired Student's  $t$  test.

## Supplementary Table 1

### Relative abundance of bacterial families among each diet and in all mice combined

|                                                                                              | CD average  | LF average    | I3C average | Overall average |
|----------------------------------------------------------------------------------------------|-------------|---------------|-------------|-----------------|
| k_Bacteria;p_Firmicutes;c_Erysipelotrichi;o_Erysipelotrichales;f_Erysipelotrichaceae         | 0.176450108 | 0.464700659   | 0.247591048 | 0.274234088     |
| k_Bacteria;p_Bacteroidetes;c_Bacteroidia;o_Bacteroidales;f_S24-7                             | 0.199449395 | 0.123568204   | 0.128024563 | 0.161060702     |
| k_Bacteria;p_Verrucomicrobia;c_Verrucomicrobiae;o_Verrucomicrobiales;f_Verrucomicrobiaceae   | 0.057919947 | 0.130534882   | 0.319514684 | 0.141034866     |
| k_Bacteria;p_Firmicutes;c_Clostridia;o_Clostridiales;f_Lachnospiraceae                       | 0.128443678 | 0.025282454   | 0.037914195 | 0.077831459     |
| k_Bacteria;p_Firmicutes;c_Bacilli;o_Lactobacillales;f_Lactobacillaceae                       | 0.128367083 | 0.029214056   | 0.020014263 | 0.074599559     |
| k_Bacteria;p_Firmicutes;c_Clostridia;o_Clostridiales;Other                                   | 0.038259267 | 0.023601923   | 0.081191576 | 0.044458965     |
| k_Bacteria;p_Actinobacteria;c_Actinobacteria;o_Bifidobacteriales;f_Bifidobacteriaceae        | 0.015458435 | 0.085793387   | 0.047286109 | 0.042790863     |
| k_Bacteria;p_Proteobacteria;c_Deltaproteobacteria;o_Desulfovibrionales;f_Desulfovibrionaceae | 0.022562838 | 0.034865496   | 0.026801647 | 0.027024897     |
| k_Bacteria;p_Firmicutes;c_Clostridia;o_Clostridiales;f__                                     | 0.04845347  | 0.006001074   | 0.007001933 | 0.02661843      |
| k_Bacteria;p_Firmicutes;c_Clostridia;o_Clostridiales;f_Ruminococcaceae                       | 0.02074361  | 0.023537134   | 0.031336934 | 0.024068194     |
| k_Bacteria;p_Firmicutes;c_Bacilli;o_Turicibacteriales;f_Turicibacteraceae                    | 0.048257014 | 0.001901098   | 7.73806E-05 | 0.023714245     |
| k_Bacteria;p_Firmicutes;c_Clostridia;o_Clostridiales;f_Clostridiaceae                        | 0.036399596 | 6.28506E-05   | 0.000146797 | 0.017524636     |
| k_Bacteria;p_Bacteroidetes;c_Bacteroidia;o_Bacteroidales;f_Prevotellaceae                    | 0.022596605 | 0.000283726   | 0.001100646 | 0.011189969     |
| k_Bacteria;p_Bacteroidetes;c_Bacteroidia;o_Bacteroidales;f_Rikenellaceae                     | 0.0140724   | 0.002557747   | 0.011112188 | 0.010137846     |
| k_Bacteria;p_Firmicutes;Other;Other;Other                                                    | 0.016681076 | 0.003885122   | 0.001619814 | 0.009483506     |
| k_Bacteria;p_Actinobacteria;c_Coriobacteriia;o_Coriobacteriales;f_Coriobacteriaceae          | 0.006404491 | 0.012066181   | 0.004457819 | 0.007522563     |
| k_Bacteria;p_Bacteroidetes;c_Bacteroidia;o_Bacteroidales;f_Bacteroidaceae                    | 0.007953848 | 0.006178197   | 0.006041413 | 0.006997682     |
| k_Bacteria;p_Firmicutes;c_Bacilli;o_Lactobacillales;f_Streptococcaceae                       | 0.000717262 | 0.003815807   | 0.009694182 | 0.003739316     |
| k_Bacteria;p_Proteobacteria;c_Alphaproteobacteria;o_Rickettsiales;f__                        | 0.001562048 | 0.003075664   | 0.003880468 | 0.002542281     |
| k_Bacteria;p_Bacteroidetes;c_Bacteroidia;o_Bacteroidales;f_Porphyrimonadaceae                | 0.00017968  | 0.00700729    | 0.000463006 | 0.002159409     |
| k_Bacteria;Other;Other;Other;Other                                                           | 0.000308934 | 0.004205754   | 0.001449977 | 0.001673894     |
| k_Bacteria;p_Firmicutes;c_Clostridia;Other;Other                                             | 0.000196381 | 0.002377021   | 0.00335733  | 0.001565588     |
| k_Bacteria;p_Bacteroidetes;c_Bacteroidia;o_Bacteroidales;f_[Odoribacteraceae]                | 0.00010789  | 0.001431372   | 0.004161956 | 0.001451441     |
| k_Bacteria;p_Proteobacteria;c_Gammaproteobacteria;o_Pseudomonadales;f_Moraxellaceae          | 0.001897397 | 0.000737582   | 2.16084E-05 | 0.00112246      |
| k_Bacteria;p_Firmicutes;c_Clostridia;o_Clostridiales;f_[Mogibacteriaceae]                    | 0.001446969 | 0.000246997   | 0.00040885  | 0.000861828     |
| k_Bacteria;p_Proteobacteria;c_Alphaproteobacteria;o_RF32;f__                                 | 0.00075304  | 0.00034592    | 0.000973969 | 0.000692069     |
| k_Bacteria;p_Cyanobacteria;c_4C0d-2;o_YS2;f__                                                |             | 0.6.88777E-05 | 0.002253691 | 0.000560172     |
| k_Bacteria;p_Proteobacteria;c_Betaproteobacteria;o_Burkholderiales;f_Alcaligenaceae          | 0.000786575 | 0.000104741   | 0.000135577 | 0.000439422     |
| k_Bacteria;p_Firmicutes;c_Bacilli;Other;Other                                                | 0.00080704  | 6.58215E-05   | 2.71165E-05 | 0.000412317     |
| k_Bacteria;p_Firmicutes;c_Clostridia;o_Clostridiales;f_Dehalobacteriaceae                    | 0.00034323  | 0.000182849   | 0.000758441 | 0.000397974     |
| k_Bacteria;p_Bacteroidetes;c_Bacteroidia;o_Bacteroidales;f__                                 | 2.83688E-06 | 0.000874319   | 1.05299E-05 | 0.000248698     |
| k_Bacteria;p_Proteobacteria;c_Gammaproteobacteria;o_Enterobacteriales;f_Enterobacteriaceae   | 0.000331185 | 5.859E-05     | 0.000235146 | 0.000231809     |
| k_Bacteria;p_Firmicutes;c_Bacilli;o_Lactobacillales;Other                                    | 0.000326591 | 0.000166859   | 4.88147E-05 | 0.0002152       |
| k_Bacteria;p_Proteobacteria;c_Betaproteobacteria;o_Burkholderiales;f_Comamonadaceae          | 0.000297337 | 0.000147422   | 0.000103714 | 0.000208891     |
| k_Bacteria;p_Tenericutes;c_Mollicutes;o_RF39;f__                                             | 0.000172895 | 0.000349109   | 1.05299E-05 | 0.000183267     |
| k_Bacteria;p_Firmicutes;c_Clostridia;o_Clostridiales;f_Veillonellaceae                       | 0.000232961 | 5.15748E-05   | 0.00014622  | 0.000161355     |
| k_Bacteria;p_Proteobacteria;c_Gammaproteobacteria;o_Pseudomonadales;f_Pseudomonadaceae       | 0.000194941 | 9.67035E-05   | 9.19042E-05 | 0.000142706     |
| k_Bacteria;p_Firmicutes;c_Bacilli;o_Bacillales;f_Staphylococcaceae                           | 0.000138951 | 0.000126464   | 6.55179E-05 | 0.000117831     |
| k_Bacteria;p_Firmicutes;c_Clostridia;o_Clostridiales;f_Eubacteriaceae                        | 0.000230757 | 9.06483E-06   | 1.64793E-05 | 0.000117257     |
| k_Bacteria;p_Tenericutes;c_Mollicutes;o_Anaeroplasmatales;f_Anaeroplasmataceae               | 0.00023811  |               | 1.08243E-05 | 0.000116891     |
| k_Bacteria;p_Bacteroidetes;c_Bacteroidia;o_Bacteroidales;f_[Barnesiellaceae]                 | 0.000211246 | 2.34583E-05   | 1.06807E-05 | 0.00011053      |
| k_Bacteria;p_Firmicutes;c_Clostridia;o_Clostridiales;f_Christensenellaceae                   | 2.8577E-06  | 0.00033745    |             | 0.9.58576E-05   |
| k_Bacteria;p_Firmicutes;c_Clostridia;o_Clostridiales;f_Peptococcaceae                        | 4.00236E-05 |               | 0.000262141 | 8.21252E-05     |
| k_Bacteria;p_Firmicutes;c_Clostridia;o_Clostridiales;f_Peptostreptococcaceae                 |             | 0.5.91006E-05 | 0.000168317 | 5.69443E-05     |

Families are ordered from the highest to lowest overall relative abundance average (the average relative abundance of all mice in the study). Also shown is the relative abundance for each diet. CD, conventional diet (n=12). LF, AhR ligand-free diet (n=7). I3C, AhR ligand-free diet supplemented with I3C (n=6).

## Supplementary Table 2

### Characterization of the top 100 most abundant *Erysipelotrichaceae* operational taxonomic units (all 3 groups combined)

| OTU abundance rank | Consensus lineage                                                                             | Average relative abundance (all samples, %) | Top BLAST result (percent match)             |
|--------------------|-----------------------------------------------------------------------------------------------|---------------------------------------------|----------------------------------------------|
| 1                  | k__Bacteria; p__Firmicutes; c__Erysipelotrichi; o__Erysipelotrichales; f__Erysipelotrichaceae | 20.7                                        | Faecalibaculum rodentium strain ALO17 (88%)  |
| 6                  | k__Bacteria; p__Firmicutes; c__Erysipelotrichi; o__Erysipelotrichales; f__Erysipelotrichaceae | 3.7                                         | Faecalibaculum rodentium strain ALO17 (93%)  |
| 11                 | k__Bacteria; p__Firmicutes; c__Erysipelotrichi; o__Erysipelotrichales; f__Erysipelotrichaceae | 1.67                                        | Faecalibaculum rodentium strain ALO17 (100%) |
| 64                 | k__Bacteria; p__Firmicutes; c__Erysipelotrichi; o__Erysipelotrichales; f__Erysipelotrichaceae | 0.138                                       | Faecalibaculum rodentium strain ALO17 (90%)  |
| 75                 | k__Bacteria; p__Firmicutes; c__Erysipelotrichi; o__Erysipelotrichales; f__Erysipelotrichaceae | 0.109                                       | Faecalibaculum rodentium strain ALO17 (92%)  |
| 80                 | k__Bacteria; p__Firmicutes; c__Erysipelotrichi; o__Erysipelotrichales; f__Erysipelotrichaceae | 0.101                                       | Faecalibaculum rodentium strain ALO17 (97%)  |

## Supplementary Table 3

### Characterization of the top 100 most abundant *Erysipelotrichaceae* operational taxonomic units within the conventional diet group

| OTU abundance rank | Consensus lineage                                                                             | Average relative abundance (all samples, %) | Top BLAST result (% match)                  |
|--------------------|-----------------------------------------------------------------------------------------------|---------------------------------------------|---------------------------------------------|
| 1                  | k__Bacteria; p__Firmicutes; c__Erysipelotrichi; o__Erysipelotrichales; f__Erysipelotrichaceae | 12.6                                        | Faecalibaculum rodentium strain ALO17 (88)  |
| 8                  | k__Bacteria; p__Firmicutes; c__Erysipelotrichi; o__Erysipelotrichales; f__Erysipelotrichaceae | 3.4                                         | Faecalibaculum rodentium strain ALO17 (93)  |
| 31                 | k__Bacteria; p__Firmicutes; c__Erysipelotrichi; o__Erysipelotrichales; f__Erysipelotrichaceae | 0.43                                        | Faecalibaculum rodentium strain ALO17 (100) |
| 56                 | k__Bacteria; p__Firmicutes; c__Erysipelotrichi; o__Erysipelotrichales; f__Erysipelotrichaceae | 0.18                                        | Faecalibaculum rodentium strain ALO17 (92)  |
| 78                 | k__Bacteria; p__Firmicutes; c__Erysipelotrichi; o__Erysipelotrichales; f__Erysipelotrichaceae | 0.074                                       | Faecalibaculum rodentium strain ALO17 (90)  |
| 92                 | k__Bacteria; p__Firmicutes; c__Erysipelotrichi; o__Erysipelotrichales; f__Erysipelotrichaceae | 0.00719                                     | Faecalibaculum rodentium strain ALO17 (97)  |



## Supplementary Table 4

### Characterization of the top 100 most abundant *Erysipelotrichaceae* operational taxonomic units within the AhR ligand-free diet group

| OTU abundance rank | Consensus lineage                                                                             | Average relative abundance (all samples, %) | Top BLAST result (% match)                  |
|--------------------|-----------------------------------------------------------------------------------------------|---------------------------------------------|---------------------------------------------|
| 1                  | k__Bacteria; p__Firmicutes; c__Erysipelotrichi; o__Erysipelotrichales; f__Erysipelotrichaceae | 37.6                                        | Faecalibaculum rodentium strain ALO17 (88)  |
| 5                  | k__Bacteria; p__Firmicutes; c__Erysipelotrichi; o__Erysipelotrichales; f__Erysipelotrichaceae | 3.6                                         | Faecalibaculum rodentium strain ALO17 (93)  |
| 6                  | k__Bacteria; p__Firmicutes; c__Erysipelotrichi; o__Erysipelotrichales; f__Erysipelotrichaceae | 3.4                                         | Faecalibaculum rodentium strain ALO17 (100) |
| 21                 | k__Bacteria; p__Firmicutes; c__Erysipelotrichi; o__Erysipelotrichales; f__Erysipelotrichaceae | 0.29                                        | Faecalibaculum rodentium strain ALO17 (90)  |
| 23                 | k__Bacteria; p__Firmicutes; c__Erysipelotrichi; o__Erysipelotrichales; f__Erysipelotrichaceae | 0.27                                        | Faecalibaculum rodentium strain ALO17 (97)  |
| 75                 | k__Bacteria; p__Firmicutes; c__Erysipelotrichi; o__Erysipelotrichales; f__Erysipelotrichaceae | 0.014                                       | Faecalibaculum rodentium strain ALO17 (92)  |

## Supplementary Table 5

### Characterization of the top 100 most abundant *Erysipelotrichaceae* operational taxonomic units within the AhR ligand-free + I3C diet group

| OTU abundance rank | Consensus lineage                                                                             | Average relative abundance (all samples, %) | Top BLAST result (% match)                  |
|--------------------|-----------------------------------------------------------------------------------------------|---------------------------------------------|---------------------------------------------|
| 2                  | k__Bacteria; p__Firmicutes; c__Erysipelotrichi; o__Erysipelotrichales; f__Erysipelotrichaceae | 16.9                                        | Faecalibaculum rodentium strain ALO17 (88)  |
| 5                  | k__Bacteria; p__Firmicutes; c__Erysipelotrichi; o__Erysipelotrichales; f__Erysipelotrichaceae | 4.4                                         | Faecalibaculum rodentium strain ALO17 (93)  |
| 8                  | k__Bacteria; p__Firmicutes; c__Erysipelotrichi; o__Erysipelotrichales; f__Erysipelotrichaceae | 2.1                                         | Faecalibaculum rodentium strain ALO17 (100) |
| 56                 | k__Bacteria; p__Firmicutes; c__Erysipelotrichi; o__Erysipelotrichales; f__Erysipelotrichaceae | 0.0914                                      | Faecalibaculum rodentium strain ALO17 (97)  |
| 59                 | k__Bacteria; p__Firmicutes; c__Erysipelotrichi; o__Erysipelotrichales; f__Erysipelotrichaceae | 0.0802                                      | Faecalibaculum rodentium strain ALO17 (90)  |
| 60                 | k__Bacteria; p__Firmicutes; c__Erysipelotrichi; o__Erysipelotrichales; f__Erysipelotrichaceae | 0.0802                                      | Faecalibaculum rodentium strain ALO17 (92)  |
